# Supplementary material
Source: publisher figshare collection journal article supplement (https://springernature.figshare.com/ndownloader/files/14512892)

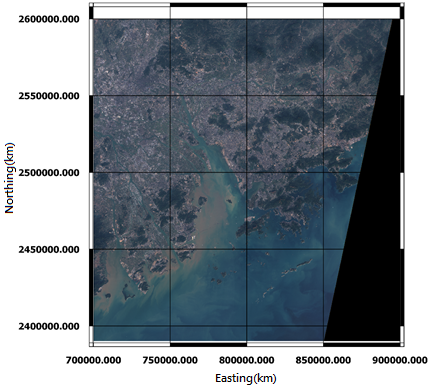

Supplement: Supplementary file 1 [file 14512892]
